# Supplementary material for: Occupational Stress and Its Adverse Health Effects Among Metal Mining Workers: A Cross-Sectional Study in China
Source: Research Square preprint supplement (doi:10.21203/rs.3.rs-6851166/v1), 2025-06-26
Supplement: Supplementary file 1 [file 3e625304e74b5f1d322c7bcc.docx]

**Occupational Stress and Its Adverse Health Effects Among Metal Mining Workers: A Cross-Sectional Study in China**

Wenya Liu a*, Sijia Lvqiua, Duoduo Wanga, Xinlv Dongb, YunFeng Niea

1. Hunan Prevention and Treatment Institute for Occupational Diseases, Affiliated Prevention and Treatment Institute for Occupational Diseases of University of South China, Changsha 410007, China.
2. The 23rd Metallurgical Construction Group Co., Ltd. of Minmetals, Changsha 410116, China.

**Correspondence**

Wenya Liu, Hunan Prevention and Treatment Institute for Occupational Diseases, Affiliated Prevention and Treatment Institute for Occupational Diseases of University of South China, Changsha 410007, China, [wyl](mailto:wangxiaoyan@csu.edu.cn)887973@163.com

**Supplementary information**

**
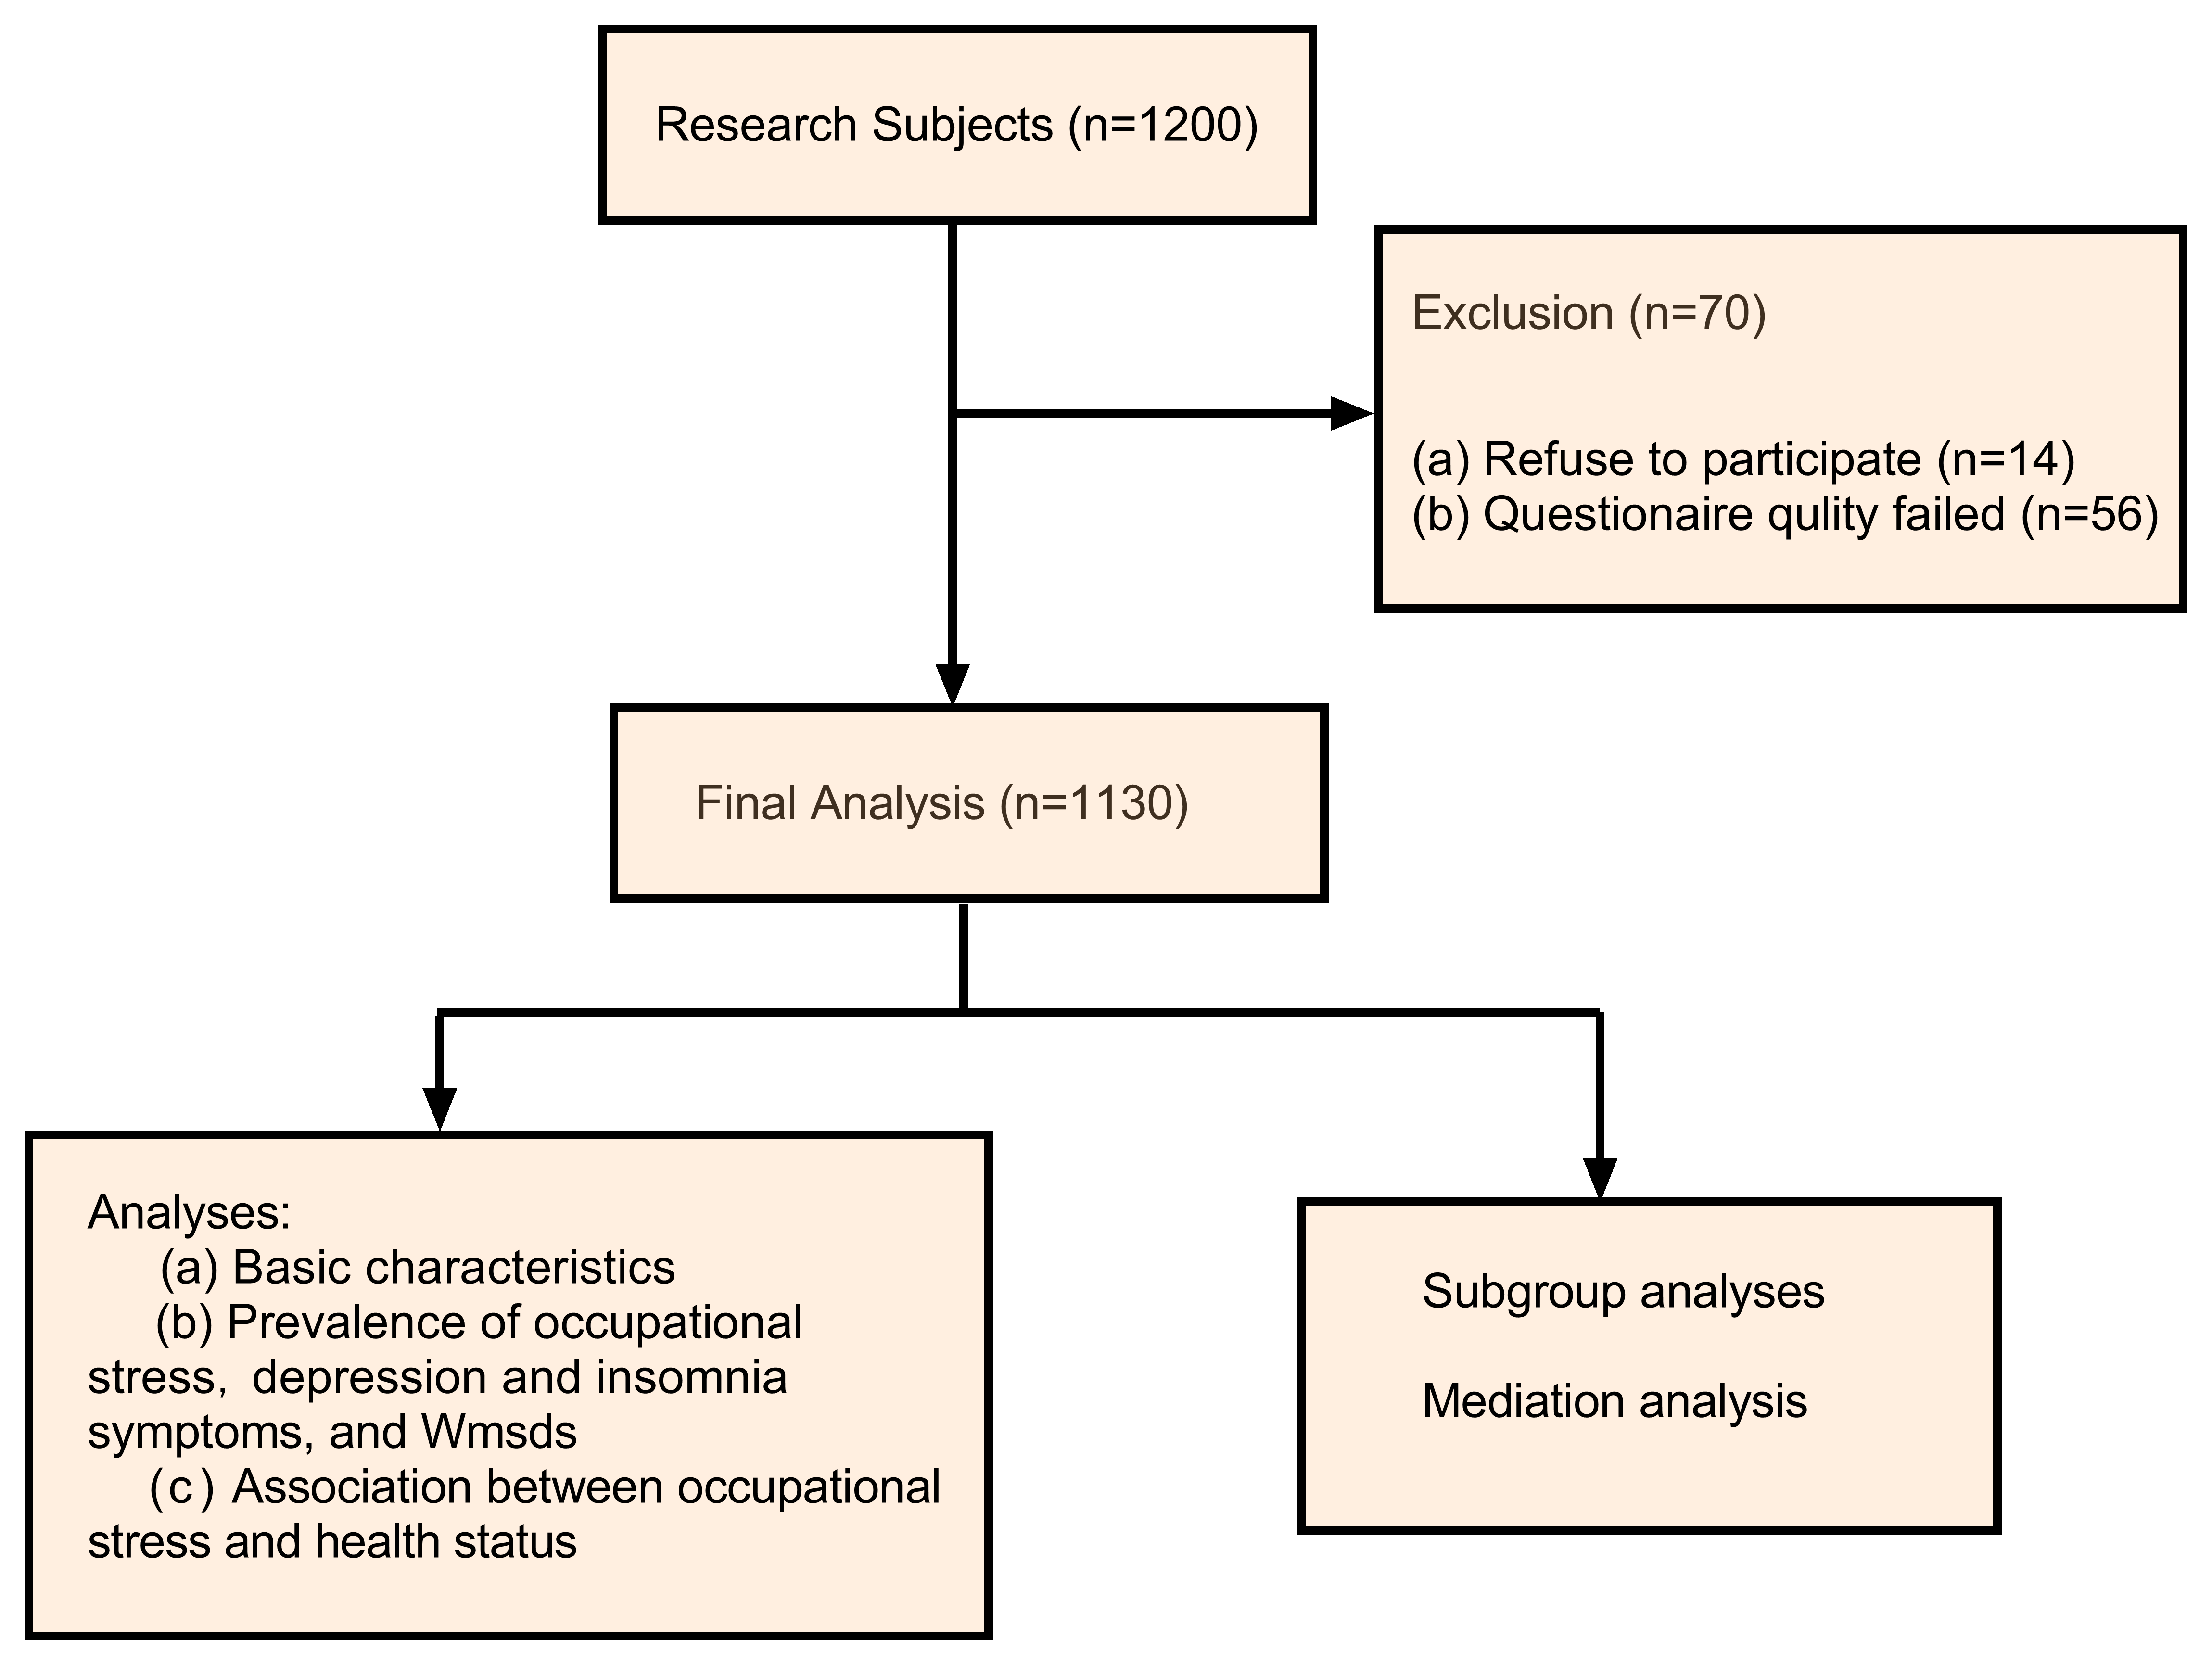
**

**Supplementary Figure S1.** The study flow diagram

**Supplementary Table S1.** Prevalence of Health Outcomes Across Occupational Stress Levels.

| **Occupational Stress** | **Total**  **n (%)** | **Depressive Symptoms**  **n (%)** | **Insomnia Symptoms**  **n (%)** | **WMSDs**  **n (%)** |
| --- | --- | --- | --- | --- |
| None | 805 (71.24) | 67 (8.32) | 244 (30.31) | 548 (68.07) |
| Mild | 196 (17.35) | 42 (21.43) | 82 (41.84) | 150 (76.53) |
| Moderate | 91 (8.05) | 33 (36.26) | 41 (45.05) | 82 (90.11) |
| Severe | 38 (3.36) | 24 (63.16) | 23 (60.53) | 34 (89.47) |
| *χ*² | - | 134.511 | 25.668 | 27.351 |
| *P*-value | - | <0.001 | <0.001 | <0.001 |
